# Supplementary material for: LINC00473 contributes to the radioresistance of esophageal squamous cell carcinoma by regulating microRNA-497-5p and cell division cycle 25A
Source: PubMed Central journal article supplement — Int J Mol Med. 2020 May 25;46(2):571–82. doi: 10.3892/ijmm.2020.4616 (PMC7307861; doi:10.3892/ijmm.2020.4616), 2020-05-25

Figure S1. (A) miR-NC and miR-497-5p mimics were transferred into KYSE-30 cells respectively, and the expression of miR-497-5p in KYSE-30 cells was detected by RT-qPCR. (B) miR-NC and miR-497-5p inhibitors were transfected into KYSE-30 cells respectively, and the expression of miR-497-5p in KYSE-30 cells was detected by RT-qPCR. \*\*\* $P < 0.001$  vs. miR-NC.

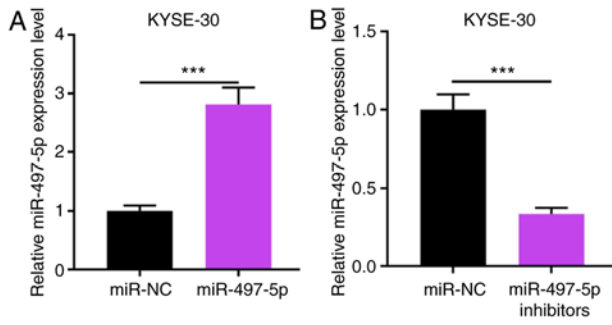

Figure S2. (A) miR-NC and miR-497-5p mimics were transferred into TE-5 cells respectively, and the expression of miR-497-5p in TE-5 cells was detected by RT-qPCR. (B) miR-NC and miR-497-5p inhibitors were transfected into TE-5 cells respectively, and the expression of miR-497-5p in TE-5 cells was detected by RT-qPCR. \*\*\*P<0.001 vs. miR-NC.

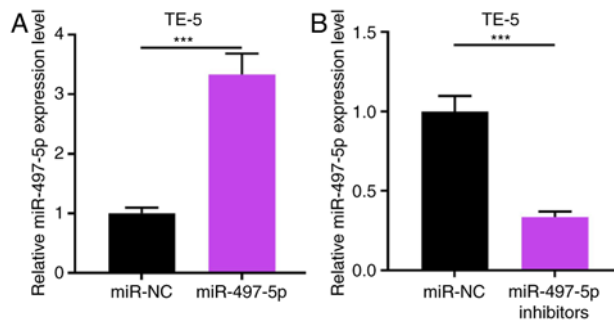

Supplement: Supplementary_Data.pdf [file Supplementary_Data.pdf]
